# Supplementary material
Source: ML conference proceedings conference paper supplement (https://openreview.net/forum?id=VbYdaK8ek0)
Supplement: supplementary_material [file attachment]

# **Efficient Adaptation of Large Vision Transformer via Adapter Re-Composing**

## **Supplementary Materials**

In the supplementary materials involving our work, we demonstrate detailed dataset settings, supplemental insights and analysis, extra experimental details, supplemental experiments, and broader impacts, including:

- **A Detailed descriptions for datasets and implementation**
- **B Insights of architecture design**
- **C Parameter size analysis**
- **D Experimental details on larger-scale and hierarchical ViT backbones**
- **E Experimental details on ablation studies**
- **F Expanded experiments with self-supervised pre-training**
- **G Broader impacts**

Due to the limitation that the file “Supplementary Materials.zip” larger than 100MB cannot be uploaded on OpenReview, the supplementary materials only upload the code for the project. Please refer to the anonymous link <https://drive.google.com/file/d/1Zb1HbYF1Jr0u0GeTLI4uII6GHt3CV3I2/view> to obtain the complete code, datasets, and models.

## A Detailed descriptions for datasets and implementation

We describe the details of visual adaptation classification tasks in Table 6 (FGVC) and 7 (VTAB-1k), including the class number and the train/val/test sets.

Table 6: Dataset statistics for FGVC. “\*” denotes the train/val split of datasets following the dataset setting of VPT models [6].

| Dataset             | Description                             | Classes | Train size | Val size | Test size |
|---------------------|-----------------------------------------|---------|------------|----------|-----------|
| CUB-200-2011 [31]   | Fine-grained bird species recognition   | 200     | 5,394*     | 600*     | 5,794     |
| NABirds [32]        | Fine-grained bird species recognition   | 555     | 21,536*    | 2,393*   | 24,633    |
| Oxford Flowers [33] | Fine-grained flower species recognition | 102     | 1,020      | 1,020    | 6,149     |
| Stanford Dogs [34]  | Fine-grained dog species recognition    | 120     | 10,800*    | 1,200*   | 8,580     |
| Stanford Cars [35]  | Fine-grained car classificatio          | 196     | 7,329*     | 815*     | 8,041     |

Table 7: Dataset statistics for VTAB-1k [36].

| Dataset              | Description | Classes | Train size | Val size | Test size |
|----------------------|-------------|---------|------------|----------|-----------|
| CIFAR-100            | Natural     | 100     | 800/1,000  | 200      | 10,000    |
| Caltech101           |             | 102     |            |          | 6,084     |
| DTD                  |             | 47      |            |          | 1,880     |
| Flowers102           |             | 102     |            |          | 6,149     |
| Pets                 |             | 37      |            |          | 3,669     |
| SVHN                 |             | 10      |            |          | 26,032    |
| Sun397               |             | 397     |            |          | 21,750    |
| Patch Camelyon       | Specialized | 2       | 800/1,000  | 200      | 32,768    |
| EuroSAT              |             | 10      |            |          | 5,400     |
| Resisc45             |             | 45      |            |          | 6,300     |
| Retinopathy          |             | 5       |            |          | 42,670    |
| Clevr/count          | Structured  | 8       | 800/1,000  | 200      | 15,000    |
| Clevr/distance       |             | 6       |            |          | 15,000    |
| DMLab                |             | 6       |            |          | 22,735    |
| KITTI/distance       |             | 4       |            |          | 711       |
| dSprites/location    |             | 16      |            |          | 73,728    |
| dSprites/orientation |             | 16      |            |          | 73,728    |
| SmallNORB/azimuth    |             | 18      |            |          | 12,150    |
| SmallNORB/elevation  |             | 9       |            |          | 12,150    |

Table 8 summarizes the detailed configurations we used for experiments. As mentioned in Section 4.1, we utilize grid search to select hyper-parameters such as learning rate, weight decay, batch size, and adapter dropout, using the validation set of each task. Note that we also apply dropout to the middle features produced by our ARC method, which we term as "adapter dropout". Specifically, during the ARC process, we randomly drop partial features before up-projection.

## B Insights of architecture design

Similar to Fig. 3, we present more visualization results of singular value distribution of adaptation matrices  $\mathbf{W}_{\text{full}} \in \mathbb{R}^{D \times D}$  learned without the bottleneck operation. As shown in Fig. 4, the singular value distribution of adaptation matrices learned on *DTD* downstream task exhibits a power-law

Table 8: The implementation details of configurations such as optimizer and hyper-parameters. We select the best hyper-parameters for each download task via using grid search.

|                        |                                              |
|------------------------|----------------------------------------------|
| Optimizer              | AdamW                                        |
| Learning Rate          | {0.2, 0.1, 0.05, 0.01, 0.005, 0.001, 0.0001} |
| Weight Decay           | {0.05, 0.01, 0.005, 0.001, 0}                |
| Batch Size             | {256, 128, 32}                               |
| Adapter Dropout        | {0.8, 0.5, 0.1, 0}                           |
| Learning Rate Schedule | Cosine Decay                                 |
| Training Epochs        | 100                                          |
| Warmup Epochs          | 10                                           |

486 distribution across various layers in the downstream tasks. This finding provides further support for  
our research motivation.

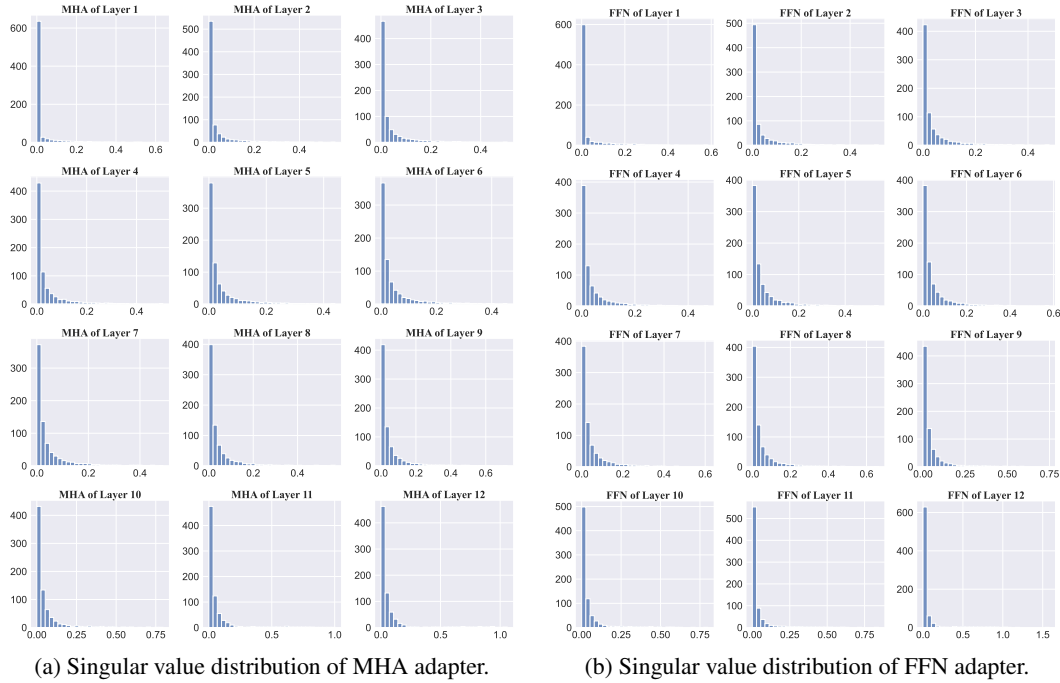

Figure 4: Singular value distribution of adaptation matrices without the bottleneck structure. Two adaptation matrices of both MHA and FFN blocks are fine-tuned on the *DTD* downstream task. The X-axis represents the singular values, while the Y-axis represents the count of singular values within specific ranges.

487

## 488 C Parameter size analysis

489 To showcase the parameter-efficiency of our ARC method, we compare its parameter size with other  
490 popular lightweight adaptation methods (Table 9), including Adapter [7], VPT [6], LoRA [24], and  
491 SSF [9]. Adapter [7] adds two linear projections to each encoder layer during fine-tuning, resulting in  
492 the introduction of  $2 \cdot D \cdot D' \cdot L$  learnable parameters, where  $D'$  denotes the hidden dimensionality  
493 of the linear projections. Furthermore, due to the presence of non-linear activations in Adapter, the  
494 additional parameters contribute to supernumerary overhead during the inference phase. VPT [6]  
495 incorporates  $m$  prompts into input space, leading to an increase of  $m \cdot D$  parameters for VPT-Shallow  
496 and  $m \cdot D \cdot L$  parameters for VPT-Deep. In contrast to Adapter, both LoRA [24] and SSF [9] employ  
497 linear adaptation methods without incorporating non-linear functions. This design choice allows  
498 them to leverage re-parameterization benefits, thereby mitigating additional computations during  
499 inference. Specifically, the adaptation matrix of LoRA, which consists of a down-projection and an  
500 up-projection, introduces  $2 \cdot w \cdot D \cdot D' \cdot L$  learnable parameters, where  $w$  denotes the number of  
501 attention matrices undergoing adaptation. SSF inserts linear scaling and shifting coefficients after

502  $o$  operations, resulting in an addition of  $2 \cdot o \cdot D \cdot L$  extra parameters. The proposed ARC method  
 503 offers additional parameter compression by sharing symmetric projection matrices across different  
 504 layers. This approach introduces only  $D \cdot D'$  parameters. Additionally, we learn low-dimensional  
 505 re-scaling coefficients and bias terms for each layer, resulting in a total of  $(D' + D) \cdot L$  additional  
 506 parameters. Overall, the number of parameters in our default ARC is  $2 \cdot ((D \cdot D') + (D' + D) \cdot L)$ .

Table 9: Comparison of the additional parameter size in both fine-tuning and inference stages with other lightweight adaptation methods.

| Method      | Adapter [7]                  | VPT-Shallow [6] | VPT-Deep [6]        | LoRA [24]                            | SSF [9]                     | ARC                                       |
|-------------|------------------------------|-----------------|---------------------|--------------------------------------|-----------------------------|-------------------------------------------|
| Stage       |                              |                 |                     |                                      |                             |                                           |
| Fine-Tuning | $2 \cdot D \cdot D' \cdot L$ | $m \cdot D$     | $m \cdot D \cdot L$ | $2 \cdot w \cdot D \cdot D' \cdot L$ | $2 \cdot o \cdot D \cdot L$ | $2 \cdot (D \cdot D' + (D' + D) \cdot L)$ |
| Inference   | $2 \cdot D \cdot D' \cdot L$ | $m \cdot D$     | $m \cdot D \cdot L$ | 0                                    | 0                           | 0                                         |

507 We also compare the parameter size with lightweight adaptation methods on backbones of different  
 508 scales, as shown in Fig. 5. Our ARCs demonstrate parameter efficiency across various model sizes,  
 509 comparable to VPT-Shallow [6]. However, the unique advantage of our approach lies in its ability  
 510 to effectively balance lower overheads and maintain competitive performance. Furthermore, the  
 511 parameter count of our ARC remains stable even as the model scale increases, showcasing the  
 512 scalability of our method with minimal additional resource consumption.

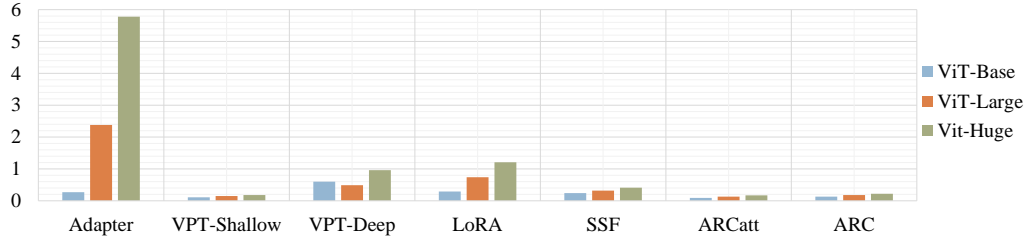

Figure 5: The parameter size comparison of lightweight adaptation methods on ViT Backbones of Different Scales. The X-axis represents different adaptation methods, while the Y-axis represents the parameter size in Million (M).

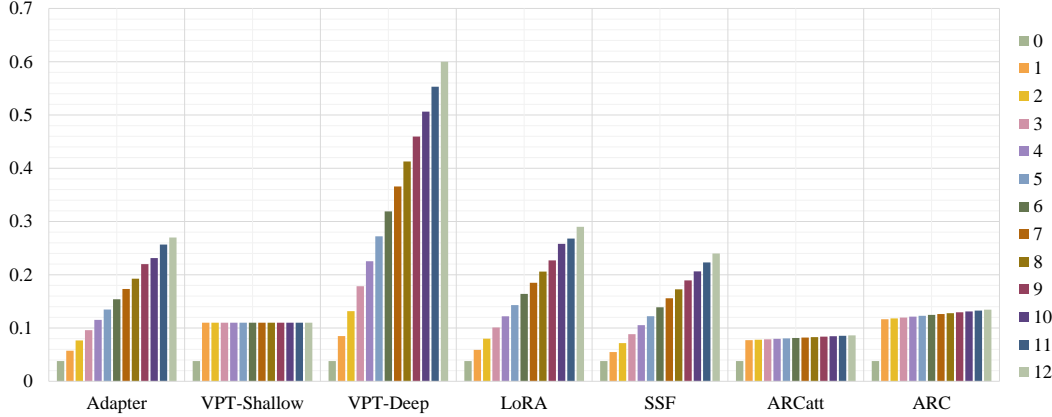

Figure 6: The parameter size comparison with lightweight adaptation methods with a different number of inserted layers. The X-axis represents different adaptation methods, while the Y-axis represents the parameter size in Million (M).

513 Thanks to our adaptation parameter sharing strategy, the ARC method avoids a linear increase in the  
 514 number of learnable parameters as the number of layers grows. We employ ViT-B as the backbone  
 515 and integrate adapters into different layers. As shown in Fig.6, in contrast to other adaptation  
 516 methods, both our ARCs and VPT-Shallow[6] effectively manage parameter growth as the number of  
 517 inserted layers increases, but only our methods achieve promising performance without significant  
 518 cost escalation. This highlights the scalability and effectiveness advantages of our ARCs.

## 519 D Experimental details on larger-scale and hierarchical ViT backbones

520 Table 10, 11 and 12 respectively display the comprehensive results of the comparison conducted in  
521 Section 4.2 among ViT-Large, ViT-Huge, and Swin-Base models.

Table 10: This table is extended from Table 3a in Section 4.2 and describes the detailed experimental results of the performance comparison on VTAB-1k using ViT-Large pre-trained on ImageNet-21k as the backbone.

| Method \ Dataset   | Natural     |             |             |             |             |             |             | Specialized |             |             |             |             | Structured  |             |             |             |             |             |             |             |             |             | Mean Total  | Params(M) |
|--------------------|-------------|-------------|-------------|-------------|-------------|-------------|-------------|-------------|-------------|-------------|-------------|-------------|-------------|-------------|-------------|-------------|-------------|-------------|-------------|-------------|-------------|-------------|-------------|-----------|
|                    | CIFAR-100   | Caltech101  | DTD         | Flowers102  | Pets        | SUNH        | Sun397      | Mean        | Camelyon    | EuroSAT     | Resisc45    | Retinopathy | Mean        | Clevr-Count | Clevr-Dist  | DMLab       | KITTI-Dist  | dSpre-Loc   | dSpre-Ori   | sNOB-Azim   | sNOB-Ele    | Mean        |             |           |
| Full fine-tuning   | 68.6        | 84.3        | 58.6        | 96.3        | 86.5        | 87.5        | 41.4        | 74.7        | 82.6        | <u>95.9</u> | 82.4        | 74.2        | 83.8        | 55.4        | 55.0        | 42.2        | 74.2        | 56.8        | 43.0        | <u>28.5</u> | 29.7        | 48.1        | 65.4        | 303.4     |
| Linear probing     | 72.2        | 86.4        | 63.6        | 97.4        | 85.8        | 38.1        | 52.5        | 70.9        | 76.9        | <u>87.3</u> | 66.6        | 45.4        | 69.1        | 28.2        | 28.0        | 34.7        | 54.0        | 10.6        | 14.2        | 14.6        | 21.9        | 25.8        | 51.5        | 0.05      |
| Adapter [7]        | 75.3        | 84.2        | 54.5        | 97.4        | 84.3        | 31.3        | 52.9        | 68.6        | 75.8        | 85.1        | 63.4        | 69.5        | 73.5        | 35.4        | 34.1        | 30.8        | 47.1        | 30.4        | 23.4        | 10.8        | 19.8        | 29.0        | 52.9        | 2.38      |
| Bias [37]          | 71.0        | 82.4        | 51.3        | 96.3        | 83.2        | 59.5        | 49.9        | 70.5        | 72.9        | 87.9        | 63.1        | 71.3        | 73.8        | 51.2        | 50.7        | 33.5        | 54.8        | 65.9        | 37.3        | 13.7        | 22.2        | 41.2        | 58.9        | 0.32      |
| VPT-Shallow [6]    | <u>80.6</u> | 88.2        | 67.1        | 98.0        | 85.9        | 78.4        | 53.0        | 78.7        | 79.7        | 93.5        | 73.4        | 73.1        | 79.9        | 41.5        | 52.5        | 32.3        | 64.2        | 48.3        | 35.3        | 21.6        | 28.8        | 40.6        | 62.9        | 0.15      |
| VPT-Deep [6]       | <b>84.1</b> | 88.9        | 70.8        | 98.8        | 90.0        | 89.0        | 55.9        | <b>82.5</b> | 82.5        | <b>96.6</b> | 82.6        | 73.9        | 83.9        | 63.7        | <u>60.7</u> | 46.1        | 75.7        | <b>83.7</b> | 47.4        | 18.9        | <b>36.9</b> | 54.1        | 70.8        | 0.49      |
| LoRA [24]          | 75.8        | <u>89.8</u> | <b>73.6</b> | <b>99.1</b> | <b>90.8</b> | 83.2        | <b>57.5</b> | 81.4        | <u>86.0</u> | 95.0        | 83.4        | 75.5        | <u>85.0</u> | <u>78.1</u> | <u>60.5</u> | <u>46.7</u> | <b>81.6</b> | 76.7        | <u>51.3</u> | 28.0        | 35.4        | <b>57.3</b> | 72.0        | 0.74      |
| ARC <sub>att</sub> | 75.6        | <b>89.9</b> | 72.2        | <u>99.0</u> | <u>90.4</u> | <u>89.0</u> | <b>57.5</b> | 81.9        | <b>86.1</b> | 95.0        | <u>85.4</u> | <b>76.0</b> | <b>85.6</b> | 75.0        | 60.1        | <b>48.0</b> | <u>80.9</u> | <u>77.0</u> | <u>51.3</u> | 27.2        | <u>35.6</u> | <u>56.9</u> | <u>72.2</u> | 0.13      |
| ARC                | 76.2        | 89.6        | <u>73.4</u> | <b>99.1</b> | 90.3        | <b>90.9</b> | <u>56.5</u> | <u>82.3</u> | 85.0        | 95.7        | <b>85.9</b> | <u>75.8</u> | <b>85.6</b> | <b>78.6</b> | <b>62.1</b> | <u>46.7</u> | 76.7        | 75.9        | <b>53.0</b> | <b>30.2</b> | 35.2        | <b>57.3</b> | <b>72.5</b> | 0.18      |

Table 11: This table is extended from Table 3b in Section 4.2 and describes the detailed experimental results of the performance comparison on VTAB-1k using ViT-Huge pre-trained on ImageNet-21k as the backbone.

| Method \ Dataset   | Natural     |             |             |             |             |             |             | Specialized |             |             |             |             | Structured  |             |             |             |             |             |             |             |             |             | Mean Total  | Params(M) |
|--------------------|-------------|-------------|-------------|-------------|-------------|-------------|-------------|-------------|-------------|-------------|-------------|-------------|-------------|-------------|-------------|-------------|-------------|-------------|-------------|-------------|-------------|-------------|-------------|-----------|
|                    | CIFAR-100   | Caltech101  | DTD         | Flowers102  | Pets        | SUNH        | Sun397      | Mean        | Camelyon    | EuroSAT     | Resisc45    | Retinopathy | Mean        | Clevr-Count | Clevr-Dist  | DMLab       | KITTI-Dist  | dSpre-Loc   | dSpre-Ori   | sNOB-Azim   | sNOB-Ele    | Mean        |             |           |
| Full fine-tuning   | 58.7        | 86.5        | 55.0        | 96.5        | 79.7        | 87.5        | 32.5        | 70.9        | 83.1        | <u>95.5</u> | 81.9        | 73.8        | 83.6        | 47.6        | 53.9        | 37.8        | 69.9        | 53.8        | 48.6        | 30.2        | 25.8        | 46.0        | 63.1        | 630.9     |
| Linear probing     | 64.3        | 83.6        | 65.2        | 96.2        | 83.5        | 39.8        | 43.0        | 67.9        | 78.0        | 90.5        | 73.9        | 73.4        | 79.0        | 25.6        | 24.5        | 34.8        | 59.0        | 9.5         | 15.6        | 17.4        | 22.8        | 26.1        | 52.7        | 0.06      |
| Adapter [7]        | 69.4        | 84.4        | 62.7        | 97.2        | 84.2        | 33.6        | 45.3        | 68.1        | 77.3        | 86.6        | 70.8        | 71.1        | 76.4        | 28.6        | 27.5        | 29.2        | 55.2        | 10.0        | 15.2        | 11.9        | 18.6        | 24.5        | 51.5        | 5.78      |
| Bias [37]          | 65.7        | 84.3        | 59.9        | 96.6        | 80.6        | 60.1        | 44.9        | 70.3        | 79.7        | 92.8        | 71.5        | 71.6        | 78.9        | 52.3        | 50.4        | 31.2        | 57.7        | 65.9        | 39.7        | 16.7        | 20.2        | 41.7        | 60.1        | 0.52      |
| VPT-Shallow [6]    | <u>70.6</u> | 84.7        | 64.8        | 96.4        | 85.1        | 75.6        | 46.2        | 74.8        | 79.9        | 93.7        | 77.7        | 73.6        | 81.2        | 40.3        | 60.9        | 34.9        | 63.3        | 61.3        | 38.9        | 19.8        | 24.9        | 43.0        | 62.8        | 0.18      |
| VPT-Deep [6]       | <b>76.9</b> | 87.2        | 66.8        | 97.5        | 84.8        | 85.5        | 46.5        | 77.9        | 81.6        | <b>96.3</b> | 82.5        | 72.8        | 83.3        | 50.4        | 61.2        | 43.9        | <b>76.6</b> | <b>79.5</b> | 50.1        | 24.7        | 31.5        | 52.2        | 68.2        | 0.96      |
| LoRA [24]          | 63.0        | <u>89.4</u> | 68.1        | <u>98.0</u> | 87.0        | 85.2        | 48.7        | 77.1        | 82.2        | 94.3        | 83.1        | 74.2        | 83.5        | 68.6        | 65.0        | 44.8        | 76.4        | 70.8        | 48.8        | 30.4        | <b>38.3</b> | <u>55.4</u> | 69.3        | 1.21      |
| ARC <sub>att</sub> | 65.5        | 89.1        | <u>69.9</u> | <u>98.0</u> | <u>87.5</u> | <u>89.1</u> | 48.8        | <u>78.3</u> | 83.4        | 94.5        | <u>84.5</u> | 74.4        | <u>84.2</u> | <u>73.2</u> | <u>66.6</u> | <u>45.6</u> | 76.2        | <u>78.3</u> | <b>51.2</b> | <u>32.1</u> | 37.6        | <b>57.6</b> | <b>70.8</b> | 0.17      |
| ARC                | 67.6        | <b>90.2</b> | <b>69.5</b> | <b>98.4</b> | <b>87.9</b> | <b>90.8</b> | <b>49.6</b> | <b>79.1</b> | <b>84.5</b> | 94.9        | <b>85.1</b> | <b>74.6</b> | <b>84.8</b> | <b>75.2</b> | <b>66.7</b> | <b>46.2</b> | 76.4        | 44.2        | <u>51.1</u> | <b>32.2</b> | <u>37.7</u> | 53.7        | 69.6        | 0.22      |

Table 12: This table is extended from Table 4 in Section 4.2 and describes the detailed experimental results of the performance comparison on VTAB-1k using Swin-Base pre-trained on ImageNet-21k as the backbone.

| Method \ Dataset   | Natural     |             |             |             |             |             |             | Specialized |             |             |             |             | Structured  |             |             |             |             |             |             |             |             |             | Mean Total  | Params(M) |
|--------------------|-------------|-------------|-------------|-------------|-------------|-------------|-------------|-------------|-------------|-------------|-------------|-------------|-------------|-------------|-------------|-------------|-------------|-------------|-------------|-------------|-------------|-------------|-------------|-----------|
|                    | CIFAR-100   | Caltech101  | DTD         | Flowers102  | Pets        | SUNH        | Sun397      | Mean        | Camelyon    | EuroSAT     | Resisc45    | Retinopathy | Mean        | Clevr-Count | Clevr-Dist  | DMLab       | KITTI-Dist  | dSpre-Loc   | dSpre-Ori   | sNOB-Azim   | sNOB-Ele    | Mean        |             |           |
| Full fine-tuning   | 72.2        | 88.0        | 71.4        | 98.3        | 89.5        | <u>89.4</u> | 45.1        | 79.1        | 86.6        | <b>96.9</b> | <b>87.7</b> | 73.6        | 86.2        | <u>75.7</u> | <b>59.8</b> | <b>54.6</b> | 78.6        | 79.4        | 53.6        | <b>34.6</b> | <b>40.9</b> | 59.7        | 72.4        | 86.9      |
| Linear probing     | 61.4        | 90.2        | 74.8        | 95.5        | 90.2        | 46.9        | <b>55.8</b> | 73.5        | 81.5        | 90.1        | 82.1        | 69.4        | 80.8        | 39.1        | 35.9        | 40.1        | 65.0        | 20.3        | 26.0        | 14.3        | 27.6        | 33.5        | 58.2        | 0.05      |
| MLP-4 [6]          | 54.9        | 87.4        | 71.4        | <b>99.5</b> | 89.1        | 39.7        | 52.5        | 70.6        | 80.5        | 90.9        | 76.8        | 74.4        | 80.7        | 60.9        | 38.8        | 40.2        | 66.5        | 9.4         | 21.1        | 14.5        | 28.8        | 31.2        | 57.7        | 4.04      |
| Partial [6]        | 60.3        | 88.9        | 72.6        | 98.7        | 89.3        | 50.5        | 51.5        | 73.1        | 82.8        | 91.7        | 80.1        | 72.3        | 81.7        | 34.3        | 35.5        | 43.2        | 77.1        | 15.8        | 26.2        | 19.1        | 28.4        | 35.0        | 58.9        | 12.65     |
| Bias [37]          | 73.1        | 86.8        | 65.7        | 97.7        | 87.5        | 56.4        | 52.3        | 74.2        | 80.4        | 91.6        | 76.1        | 72.5        | 80.1        | 47.3        | 48.5        | 34.7        | 66.3        | 57.6        | 36.2        | 17.2        | 31.6        | 42.4        | 62.1        | 0.25      |
| VPT-Shallow [6]    | 78.0        | <b>91.3</b> | <u>77.2</u> | <u>99.4</u> | <u>90.4</u> | 68.4        | <u>54.3</u> | <u>79.9</u> | 80.1        | 93.9        | 83.0        | 72.7        | 82.5        | 40.8        | 43.9        | 34.1        | 63.2        | 28.4        | 44.5        | 21.5        | 26.3        | 37.8        | 62.9        | 0.05      |
| VPT-Deep [6]       | <b>79.6</b> | <b>90.8</b> | <b>78.0</b> | <b>99.5</b> | <b>91.4</b> | 46.5        | 51.7        | 76.8        | 84.9        | <u>96.2</u> | 85.0        | 72.0        | 84.5        | 67.6        | <u>59.4</u> | 50.1        | 74.1        | 74.4        | 50.6        | 25.7        | 25.7        | 53.4        | 67.7        | 0.22      |
| ARC <sub>att</sub> | 67.2        | 89.7        | 74.7        | <b>99.5</b> | 89.7        | 88.5        | 52.7        | <b>80.3</b> | <u>88.1</u> | 95.9        | <u>85.7</u> | <u>77.2</u> | <b>86.7</b> | <b>76.5</b> | 58.5        | 52.1        | <u>82.8</u> | 89.4        | <b>56.4</b> | 27.5        | <u>35.1</u> | <u>59.8</u> | <b>73.0</b> | 0.16      |
| ARC                | 62.5        | 90.0        | 71.9        | 99.2        | 87.8        | <b>90.7</b> | 51.1        | 79.0        | <b>89.1</b> | 95.8        | 84.5        | <u>77.0</u> | <u>86.6</u> | 75.4        | 57.4        | <u>53.4</u> | <b>83.1</b> | <b>91.7</b> | <u>55.2</u> | 31.6        | 31.8        | <b>59.9</b> | <u>72.6</u> | 0.27      |

## 522 E Experimental details on ablation studies

523 Table 13, 14, 15 and 16 display the complete results of the ablation studies in Section 4.3.

Table 13: This table is extended from Table 5a in Section 4.3 and describes the detailed experimental content of the performance comparison among different bottleneck dimensionality.

| Dataset   |  | Natural   |            |      |            |      |      |        | Specialized |          |         |          |             | Structured |             |            |       |            |          |          |           |          |      | Mean Total |      | Params.(M) |
|-----------|--|-----------|------------|------|------------|------|------|--------|-------------|----------|---------|----------|-------------|------------|-------------|------------|-------|------------|----------|----------|-----------|----------|------|------------|------|------------|
|           |  | CIFAR-100 | Caltech101 | DTD  | Flowers102 | Pets | SVNH | Sun397 | Mean        | Camelyon | EuroSAT | Resisc45 | Retinopathy | Mean       | Clevr-Count | Clevr-Dist | DMLab | KITTI-Dist | dSpr-Loc | dSpr-Ori | sNOB-Azim | sNOB-Ele | Mean |            |      |            |
| Dimension |  | 72.2      | 88.4       | 71.2 | 98.7       | 91.1 | 89.4 | 54.7   | 80.9        | 84.7     | 95.6    | 86.0     | 75.8        | 85.6       | 80.1        | 65.9       | 48.8  | 80.5       | 75.5     | 48.3     | 30.2      | 38.6     | 58.5 | 72.4       | 0.07 |            |
| 10        |  | 72.2      | 90.1       | 72.7 | 99.0       | 91.0 | 91.9 | 54.4   | 81.6        | 84.9     | 95.7    | 86.7     | 75.8        | 85.8       | 80.7        | 67.1       | 48.7  | 81.6       | 79.2     | 51.0     | 31.4      | 39.9     | 60.0 | 73.4       | 0.13 |            |
| 50        |  | 71.3      | 90.0       | 73.0 | 99.0       | 90.7 | 91.8 | 55.1   | 81.6        | 85.1     | 96.3    | 86.1     | 75.4        | 85.7       | 80.8        | 67.2       | 49.0  | 79.3       | 74.8     | 50.1     | 34.0      | 39.1     | 59.3 | 73.1       | 0.21 |            |
| 100       |  | 70.5      | 89.3       | 72.9 | 99.1       | 89.8 | 91.9 | 54.9   | 81.2        | 84.9     | 95.3    | 84.0     | 75.7        | 85.0       | 80.0        | 67.8       | 48.9  | 76.8       | 50.8     | 51.3     | 34.4      | 39.1     | 56.1 | 71.4       | 0.36 |            |
| 200       |  |           |            |      |            |      |      |        |             |          |         |          |             |            |             |            |       |            |          |          |           |          |      |            |      |            |

Table 14: This table is extended from Table 5b in Section 4.3 and describes the detailed experimental content of the performance comparison among different adapter positioning.

|          |                  | Natural     |             |             |             |             |             |             | Specialized |             |             |             |             | Structured  |             |             |             |             |             |             |             |             |             |             |            |
|----------|------------------|-------------|-------------|-------------|-------------|-------------|-------------|-------------|-------------|-------------|-------------|-------------|-------------|-------------|-------------|-------------|-------------|-------------|-------------|-------------|-------------|-------------|-------------|-------------|------------|
| Dataset  |                  | CIFAR-100   | Caltech101  | DTD         | Flowers102  | Pets        | SVNH        | Sun397      | Mean        | Camelyon    | EuroSAT     | Resisc45    | Retinopathy | Mean        | Clevr-Count | Clevr-Dist  | DMLab       | KITTI-Dist  | dSpr-Loc    | dSpr-Ori    | sNOB-Azim   | sNOB-Ele    | Mean        | Mean Total  | Params.(M) |
| Location |                  |             |             |             |             |             |             |             |             |             |             |             |             |             |             |             |             |             |             |             |             |             |             |             |            |
|          | Before MHA       | 70.1        | <b>90.5</b> | 70.5        | 98.8        | 90.8        | 88.6        | 53.6        | 80.4        | 84.6        | 95.5        | 86.6        | 75.5        | 85.6        | 79.0        | 65.6        | 48.6        | 81.3        | 75.1        | 48.7        | 29.1        | 39.6        | 58.4        | 72.2        | 0.08       |
|          | After MHA        | 67.0        | 88.9        | 69.8        | 98.8        | 90.8        | 82.2        | 52.3        | 78.5        | 84.1        | 94.6        | 85.1        | 75.4        | 84.8        | 77.4        | 60.1        | 44.3        | 77.1        | 61.2        | 45.7        | 23.0        | 35.6        | 53.0        | 69.1        | 0.08       |
|          | Before FFN       | 70.8        | 89.4        | 71.0        | <b>99.0</b> | 89.9        | 86.9        | 53.9        | 80.1        | <b>85.5</b> | 94.7        | 84.9        | 75.6        | 85.2        | 77.3        | 63.6        | 46.5        | 77.5        | 70.3        | 48.4        | 27.6        | 37.3        | 56.0        | 71.1        | 0.08       |
|          | After FFN        | 66.7        | 88.2        | 69.6        | 98.6        | 90.2        | 82.5        | 52.9        | 78.4        | 83.6        | 94.8        | 85.3        | 75.5        | 84.8        | 77.9        | 63.1        | 44.1        | 76.7        | 57.9        | 47.0        | 22.6        | 33.9        | 52.9        | 69.0        | 0.08       |
|          | Before MHA & FFN | <b>72.2</b> | <u>90.1</u> | <b>72.7</b> | <b>99.0</b> | <u>91.0</u> | <b>91.9</b> | <b>54.4</b> | <b>81.6</b> | <u>84.9</u> | <b>95.7</b> | <b>86.7</b> | <u>75.8</u> | <b>85.8</b> | <b>80.7</b> | <b>67.1</b> | <b>48.7</b> | <b>81.6</b> | <b>79.2</b> | <b>51.0</b> | <b>31.4</b> | <b>39.9</b> | <b>60.0</b> | <b>73.4</b> | 0.13       |
|          | After MHA & FFN  | 70.5        | 89.9        | <u>71.3</u> | <b>99.0</b> | <b>91.4</b> | 86.9        | 53.5        | <u>80.4</u> | 84.7        | 94.9        | 86.4        | <b>76.0</b> | 85.5        | <u>80.3</u> | 62.8        | 46.8        | 80.9        | 66.9        | <u>49.6</u> | 28.4        | 36.4        | 56.5        | 71.4        | 0.13       |

Table 15: This table is extended from Table 5c in Section 4.3 and describes the detailed experimental content of the performance comparison among different parameter sharing strategy.

| Strategy              | Dataset | Natural     |             |             |             |             |             |             | Specialized |             |             |             |             | Structured  |             |             |             |             |             |             |             |             |             | Mean Total  | Params.(M) |
|-----------------------|---------|-------------|-------------|-------------|-------------|-------------|-------------|-------------|-------------|-------------|-------------|-------------|-------------|-------------|-------------|-------------|-------------|-------------|-------------|-------------|-------------|-------------|-------------|-------------|------------|
|                       |         | CIFAR-100   | Caltech101  | DTD         | Flowers102  | Pets        | SVNH        | Sun397      | Mean        | Camelyon    | EuroSAT     | Resisc45    | Retinopathy | Mean        | Clevr-Count | Clevr-Dist  | DMLab       | KITTI-Dist  | dSpreLoc    | dSpreOri    | sNOB-Azim   | sNOB-Ele    | Mean        |             |            |
| non-intra + non-inter |         | 70.1        | <b>91.1</b> | 71.5        | <b>99.2</b> | 90.6        | <b>91.9</b> | <u>54.6</u> | 81.3        | 84.8        | <u>95.5</u> | 86.4        | 75.4        | 85.5        | <b>81.1</b> | 66.1        | <b>50.1</b> | 78.6        | <b>80.3</b> | <b>51.5</b> | <b>35.8</b> | <u>40.6</u> | <b>60.5</b> | <b>73.4</b> | 0.98       |
| intra + inter*        |         | <b>72.9</b> | 89.8        | 72.1        | 98.8        | <b>91.0</b> | <u>90.7</u> | <u>54.6</u> | 81.4        | <u>85.8</u> | <u>95.5</u> | 86.3        | 75.6        | <u>85.8</u> | 80.3        | <u>66.5</u> | 48.8        | 79.6        | 77.0        | 50.7        | 30.9        | 39.0        | 59.1        | <u>72.9</u> | 0.10       |
| intra + inter         |         | <u>72.2</u> | <u>90.1</u> | <u>72.7</u> | 99.0        | <b>91.0</b> | <b>91.9</b> | 54.4        | <b>81.6</b> | 84.9        | <b>95.7</b> | <b>86.7</b> | <u>75.8</u> | <u>85.8</u> | <u>80.7</u> | <b>67.1</b> | 48.7        | <b>81.6</b> | <u>79.2</u> | <u>51.0</u> | 31.4        | 39.9        | 60.0        | <b>73.4</b> | 0.13       |
| non-intra + inter     |         | <b>72.9</b> | 89.5        | <b>72.9</b> | 98.8        | <u>90.6</u> | 90.2        | <b>55.8</b> | <u>81.5</u> | <b>86.2</b> | <u>95.5</u> | 86.2        | <b>75.9</b> | <b>86.0</b> | <b>81.1</b> | <b>67.1</b> | 48.3        | <u>81.0</u> | 78.5        | 50.6        | <u>31.5</u> | <b>41.9</b> | <u>60.0</u> | <b>73.4</b> | 0.21       |

Table 16: This table is extended from Table 5d in Section 4.3 and describes the detailed experimental content of the performance comparison among different adapter insertion.

|            |                     | Natural   |            |      |            |      |      |        |      | Specialized |         |          |             |      | Structured  |            |       |            |          |          |           |          |      |            |            |  |
|------------|---------------------|-----------|------------|------|------------|------|------|--------|------|-------------|---------|----------|-------------|------|-------------|------------|-------|------------|----------|----------|-----------|----------|------|------------|------------|--|
| Dataset    |                     | CIFAR-100 | Caltech101 | DTD  | Flowers102 | Pets | SVNH | Sun397 | Mean | Camelyon    | EuroSAT | Resisc45 | Retinopathy | Mean | Clevr-Count | Clevr-Dist | DMLab | KITTI-Dist | dSpr-Loc | dSpr-Ori | sNOB-AzIm | sNOB-Ele | Mean | Mean Total | Params.(M) |  |
| Layer Form |                     | 69.0      | 88.1       | 70.2 | 98.4       | 90.0 | 89.8 | 52.3   | 79.7 | 84.1        | 94.5    | 85.4     | 75.5        | 84.9 | 80.2        | 67.3       | 46.4  | 78.8       | 74.4     | 48.1     | 29.1      | 37.6     | 57.7 | 71.5       | 0.126      |  |
|            | 1 ~ 6 & sequential  | 57.9      | 88.2       | 68.4 | 98.3       | 89.2 | 70.3 | 52.1   | 74.9 | 82.2        | 94.3    | 84.3     | 76.4        | 84.3 | 77.0        | 58.1       | 45.4  | 75.3       | 74.0     | 42.7     | 21.0      | 34.9     | 53.6 | 67.9       | 0.126      |  |
|            | 7 ~ 12 & sequential | 72.2      | 90.1       | 72.7 | 99.0       | 91.0 | 91.9 | 54.4   | 81.6 | 84.9        | 95.7    | 86.7     | 75.8        | 85.8 | 80.7        | 67.1       | 48.7  | 81.6       | 79.2     | 51.0     | 31.4      | 39.9     | 60.0 | 73.4       | 0.133      |  |
|            | 1 ~ 12 & sequential | 70.7      | 90.9       | 71.5 | 98.9       | 91.1 | 86.1 | 53.8   | 80.4 | 83.5        | 95.1    | 85.6     | 75.4        | 84.9 | 76.6        | 64.1       | 45.9  | 76.9       | 62.0     | 46.0     | 25.3      | 37.2     | 54.3 | 70.4       | 0.133      |  |
|            | 1 ~ 12 & parallel   |           |            |      |            |      |      |        |      |             |         |          |             |      |             |            |       |            |          |          |           |          |      |            |            |  |

## F Expanded experiments with self-supervised pre-training

In addition to the models pre-trained with supervised objectives in Section 4, we also conduct experiments with self-supervised pre-training approaches: MAE [2] and Moco V3 [23]. Specifically, We utilize MAE [2] and Moco V3 [23] self-supervised pre-trained ViT-B as the backbone and evaluate the performance of our ARC on VTAB-1k. The results of MAE and Moco V3 self-supervised models are presented in Table 17 and Table 18, respectively. We observe that our ARC still exhibits competitive performance on two self-supervised ViTs. In addition, our ARC method outperforms other adaptation methods: Adapter[7] and LoRA [24] on the majority of downstream tasks. Surprisingly, the ARC<sub>att</sub> with smaller learnable parameters even surpasses the ARC across different self-supervised pre-trained models. A possible explanation could be that ARC<sub>att</sub> contains fewer parameters, which allows it to effectively prevent overfitting.

Table 17: Performance comparison on VTAB-1k using MAE self-supervised pre-trained ViT-Base as backbone.

| Method             | Dataset | Natural     |             |             |             |             |             |             | Specialized |             |             |             |             | Structured  |             |             |             |             |             |             |               |             |             | Mean Total  | Params.(M) |
|--------------------|---------|-------------|-------------|-------------|-------------|-------------|-------------|-------------|-------------|-------------|-------------|-------------|-------------|-------------|-------------|-------------|-------------|-------------|-------------|-------------|---------------|-------------|-------------|-------------|------------|
|                    |         | CIFAR-100   | Caltech101  | DTD         | Flowers102  | Pets        | SUN39       | SUN397      | Mean        | Camelyon    | EuroSAT     | Resisc45    | Retinopathy | Mean        | Clevr-Count | Clevr-Dist  | DMLab       | KITTI-Dist  | dSpc-Loc    | dSpc-Ori    | sNORB-Azimuth | sNORB-Ele   | Mean        |             |            |
| Full fine tuning   |         | 24.6        | 84.2        | 56.9        | 72.7        | 74.4        | 86.6        | 15.8        | 59.3        | 81.8        | <b>94.0</b> | 72.3        | 70.6        | 79.7        | 67.0        | 59.8        | 45.2        | 75.3        | 72.5        | 47.5        | 30.2          | 33.0        | 53.8        | 61.3        | 85.80      |
| Linear             |         | 8.7         | 41.5        | 20.6        | 19.2        | 11.3        | 22.3        | 8.6         | 18.9        | 76.5        | 68.6        | 16.6        | 53.2        | 53.7        | 33.6        | 32.5        | 23.0        | 51.1        | 13.0        | 9.9         | 8.5           | 17.9        | 23.7        | 28.2        | 0.04       |
| Bias [37]          |         | 22.4        | 82.6        | 49.7        | 66.2        | 67.7        | 69.0        | 24.3        | 54.6        | 78.7        | 91.4        | 60.0        | 72.6        | 75.7        | 65.9        | 51.0        | 35.0        | 69.1        | 70.8        | 37.6        | 21.5          | 30.7        | 47.7        | 56.1        | 0.14       |
| Adapter [7]        |         | <b>35.1</b> | 85.0        | 56.5        | 66.6        | 71.3        | 45.0        | <b>24.8</b> | 54.9        | 76.9        | 87.1        | 63.5        | 73.3        | 75.2        | 43.8        | 49.5        | 31.2        | 61.7        | 59.3        | 23.3        | 13.6          | 29.6        | 39.0        | 52.5        | 0.76       |
| VPT-Shallow [6]    |         | 21.9        | 76.2        | 54.7        | 58.0        | 41.3        | 16.1        | 15.1        | 40.0        | 74.0        | 69.5        | 58.9        | 72.7        | 68.8        | 40.3        | 44.7        | 27.9        | 60.5        | 11.8        | 11.0        | 12.4          | 16.3        | 28.1        | 41.2        | 0.04       |
| VPT-Deep [6]       |         | 8.2         | 55.2        | 58.0        | 39.3        | 45.2        | 19.4        | 21.9        | 35.3        | 77.9        | 91.0        | 45.4        | 73.6        | 72.0        | 39.0        | 40.9        | 30.6        | 53.9        | 21.0        | 12.1        | 11.0          | 14.9        | 27.9        | 39.9        | 0.06       |
| LoRA [24]          |         | 31.8        | <b>88.4</b> | 59.9        | <b>81.7</b> | <b>85.3</b> | 90.3        | 23.7        | 65.9        | 84.2        | 92.5        | 76.2        | 75.4        | 82.1        | <b>85.9</b> | <b>64.1</b> | 49.4        | <b>82.8</b> | <b>83.9</b> | 51.8        | <b>34.6</b>   | <b>41.3</b> | 61.7        | 67.5        | 0.30       |
| ARC <sub>att</sub> |         | 34.8        | <b>89.3</b> | <b>62.0</b> | <b>85.9</b> | 84.4        | 91.1        | <b>24.8</b> | <b>67.4</b> | <b>85.8</b> | <b>93.5</b> | <b>81.3</b> | <b>75.6</b> | <b>84.1</b> | 84.0        | 63.5        | <b>51.2</b> | <b>83.0</b> | <b>89.1</b> | <b>54.0</b> | 34.2          | <b>43.0</b> | <b>62.7</b> | <b>69.0</b> | 0.09       |
| ARC                |         | 31.3        | <b>89.3</b> | <b>61.2</b> | <b>85.9</b> | 83.1        | <b>91.6</b> | 24.4        | <b>66.7</b> | <b>86.0</b> | <b>94.0</b> | <b>80.4</b> | 74.8        | <b>83.8</b> | <b>85.8</b> | <b>64.6</b> | <b>50.5</b> | <b>82.8</b> | 82.8        | <b>53.5</b> | <b>36.3</b>   | 39.7        | <b>62.0</b> | <b>68.3</b> | 0.13       |

Table 18: Performance comparison on VTAB-1k using Moco V3 self-supervised pre-trained ViT-Base as backbone.

| Method             | Dataset | Natural     |             |             |             |             |             |             | Specialized |             |             |             |             | Structured  |             |             |             |             |             |             |               |             |             | Mean Total  | Params.(M) |
|--------------------|---------|-------------|-------------|-------------|-------------|-------------|-------------|-------------|-------------|-------------|-------------|-------------|-------------|-------------|-------------|-------------|-------------|-------------|-------------|-------------|---------------|-------------|-------------|-------------|------------|
|                    |         | CIFAR-100   | Caltech101  | DTD         | Flowers102  | Pets        | SUN39       | SUN397      | Mean        | Camelyon    | EuroSAT     | Resisc45    | Retinopathy | Mean        | Clevr-Count | Clevr-Dist  | DMLab       | KITTI-Dist  | dSpc-Loc    | dSpc-Ori    | sNORB-Azimuth | sNORB-Ele   | Mean        |             |            |
| Full fine tuning   |         | 57.6        | <b>91.0</b> | 64.6        | 91.5        | 79.9        | 89.8        | 29.1        | 72.0        | 85.1        | <b>96.4</b> | 83.1        | 74.3        | 84.7        | 55.1        | 56.9        | 44.7        | 77.9        | 63.8        | 49.0        | 31.5          | 36.9        | 52.0        | 66.2        | 85.69      |
| Linear             |         | 62.9        | 85.1        | 68.8        | 87.0        | 85.8        | 41.8        | <b>40.9</b> | 67.5        | 80.3        | 93.6        | 77.9        | 72.6        | 81.1        | 42.3        | 34.8        | 36.4        | 59.2        | 10.1        | 22.7        | 12.6          | 24.7        | 30.3        | 54.7        | 0.04       |
| Bias [37]          |         | 65.5        | 89.2        | 62.9        | 88.9        | 80.5        | 82.7        | 40.5        | 72.9        | 80.9        | 95.2        | 77.7        | 70.8        | 81.1        | 71.4        | 59.4        | 39.8        | 77.4        | 70.2        | 49.0        | 17.5          | 42.8        | 53.4        | 66.4        | 0.14       |
| Adapter [7]        |         | <b>73.0</b> | 88.2        | <b>69.3</b> | 90.7        | 87.4        | 69.9        | <b>40.9</b> | 74.2        | 82.4        | 93.4        | 80.5        | 74.3        | 82.7        | 55.6        | 56.1        | 39.1        | 73.9        | 60.5        | 40.2        | 19.0          | 37.1        | 47.7        | 64.8        | 0.98       |
| VPT-Shallow [6]    |         | 68.3        | 86.8        | <b>69.7</b> | 90.0        | 59.7        | 56.9        | 39.9        | 67.3        | 81.7        | 94.7        | 78.9        | 73.8        | 82.3        | 34.3        | 56.8        | 40.6        | 49.1        | 40.4        | 31.8        | 13.1          | 34.4        | 37.6        | 57.9        | 0.05       |
| VPT-Deep [6]       |         | <b>70.1</b> | 88.3        | 65.9        | 88.4        | 85.6        | 57.8        | 35.7        | 70.3        | 83.1        | 93.9        | 81.2        | 74.0        | 83.0        | 48.5        | 55.8        | 37.2        | 64.6        | 52.3        | 26.5        | 19.4          | 34.8        | 42.4        | 61.2        | 0.05       |
| LoRA [24]          |         | 58.8        | 90.8        | 66.0        | 91.8        | 88.1        | 87.6        | 40.6        | 74.8        | 86.4        | 95.3        | 83.4        | <b>75.5</b> | 85.1        | <b>83.0</b> | <b>64.6</b> | <b>51.3</b> | <b>81.9</b> | <b>83.2</b> | 47.5        | 32.4          | <b>47.3</b> | 61.4        | 71.3        | 0.30       |
| ARC <sub>att</sub> |         | 59.3        | 90.9        | 67.7        | <b>93.6</b> | <b>89.2</b> | 90.5        | 40.3        | <b>75.9</b> | <b>87.1</b> | 94.8        | <b>85.4</b> | <b>75.5</b> | <b>85.7</b> | <b>84.0</b> | <b>64.9</b> | <b>52.5</b> | <b>83.1</b> | <b>88.2</b> | <b>53.4</b> | <b>33.0</b>   | 46.2        | <b>63.2</b> | <b>72.6</b> | 0.09       |
| ARC                |         | 60.0        | <b>91.3</b> | 67.9        | <b>92.8</b> | <b>89.3</b> | <b>91.4</b> | <b>40.9</b> | <b>76.2</b> | <b>87.5</b> | 95.6        | <b>86.1</b> | <b>75.6</b> | <b>86.2</b> | 83.0        | 64.2        | 50.2        | 80.6        | <b>85.0</b> | 53.0        | <b>34.6</b>   | <b>47.4</b> | <b>62.3</b> | <b>72.4</b> | 0.13       |

## 535 G Broader impacts

536 **Efficient usability.** Unlike previous approaches, our method incorporates a parameter sharing  
537 scheme across different layers of the model, resulting in a significant reduction in the number of  
538 parameters that need to be fine-tuned. This approach allows us to maintain competitive performance  
539 while achieving parameter efficiency. By maximizing the utilization of large-scale pre-trained models,  
540 our ARC methods offer enhanced usability and practicality in various applications.

541 **Environmental-friendly consumption.** In addition to the reduction in computational overheads,  
542 another significant benefit of our method is the positive impact on carbon emissions reduction and  
543 environmental protection. By optimizing the computational efficiency of the model, we minimize  
544 the energy consumption required during the training and deployment of the model. This reduction  
545 in energy consumption leads to a decrease in carbon emissions, contributing to environmental  
546 sustainability. Our method not only delivers improved performance and efficiency but also aligns  
547 with the larger goal of mitigating the environmental impact of AI technologies.

548 **Ethical Considerations.** Our model focuses on utilizing the representation and generalization  
549 capacity obtained from large-scale pre-trained datasets and models. However, it is crucial to acknowl-  
550 edge that if the pre-training datasets contain bias or illegal information, there is a risk of inheriting  
551 such issues into our model.

552 In order to address this concern, it becomes imperative to explore research directions that aim  
553 to identify and prevent privacy leakage and correct model bias. This involves developing robust  
554 mechanisms to detect and mitigate bias in training data, as well as implementing privacy-preserving  
555 techniques to safeguard sensitive information.
